# Supplementary material for: Coordinate Nuclear Targeting of the FANCD2 and FANCI Proteins via a FANCD2 Nuclear Localization Signal
Source: PubMed Central journal article supplement (PMC3836817; doi:10.1371/journal.pone.0081387), 2013-11-21
Supplement: pone.0081387.s001.pdf [file pone.0081387.s001.pdf]

**A**

| Predicted NLSs in query sequence                      |      |
|-------------------------------------------------------|------|
| MVSKRRLSKSEDKESLTEDASKTRKQPLSKKTKKSHIANEVEENDSIFVK    | 50   |
| LLKISGII LKTGESQNQLAVDQIAFQKKLFQTLRRHPSYPKIEEFVSGL    | 100  |
| ESYIEDEDSFRNCLLSCERLQDEEASMGASYSKSLIKLLLGIDILQPAAI    | 150  |
| KTLFEKLEPEYFFENKNSDEINIPRLIVSQLKWLDRVVDGKDLTTKIMQLI   | 200  |
| SIAPENLQHDIIITSLPEILGDSQHADVKGELSDLLIENTSLTVPILDVLS   | 250  |
| SLRLDPNFKLVKVRQLVMDKLSRILEDLPVIKFIILHSVTAMDTELVISE    | 300  |
| LREKLDLQHCVLPSRLQASQVKLKSGRASSGNQESSGQSCIIILFDVI      | 350  |
| KSAIRYEKTISEAWIKAIENTASVSEHKVFDLVMLFIIYSTNTQTKKYID    | 400  |
| RVLRNKIRSGCIQEQLLQSTFSVHYLVLKDMCSSILSLAQSLLHSLDQSI    | 450  |
| ISFGSLLYKYAFKFFDTCQQEVVVGALVTHICSGNEAEVDTALDVLELV     | 500  |
| VLNPSAMMNAVFVKGILDYLDNISPPQIRKLFYVLSTLAFSKQNEASSH     | 550  |
| IQDDMHLVIRKQLSSTVFYKYLIGIIGAVTMAGIMADRSESPSLTQERA     | 600  |
| NLSDEQCTQVTSLQLVHSCSEQSPQASALYDEFANLIQHEKLDPKALE      | 650  |
| VWGH TICDNDFQADAVVDSCVVPEDFPFPVKALYGLEEYDTQDGIAINLL   | 700  |
| PLLFSDQFAKGGPVTSEQESGQKLVSPCLLAPYFRLLRLCVERQHNGNLE    | 750  |
| EIDGLLDCPIFLTDLEPGEKLESMAKERSFMCSLIFLTLNWFREIVNAF     | 800  |
| CQETSPENKGGVLTRELKHIVELQIILEKYLAVTPDYVPPPLGNFVETLDI   | 850  |
| TPHTVTAISAKIRKKKGIERKQKTGSKTSSSDTLSEKNECDPTPSHR       | 900  |
| QQLNKEFTGKEKTSLLLHNSHAFFRELDIEVFSILHCGLVTKFILDTEM     | 950  |
| HTEATEVVQLGPPPELLFLEEDLSQKLESMLTPPIARRVFPFLKKNKGSRNIG | 1000 |
| FSHLQQRSAQEI VHCVFQLLTPMCNHLENIHNYFQCLAENHGVDGPGV     | 1050 |
| KVQEYHIMSSCYQRLQIFHGLFAWGFSPENQNLISALHVLSSRLKQ        | 1100 |
| GEHSQPLEELLSQSVHYLQNFHQSI PSFQCALYLIRLLMVILEKSTASAQ   | 1150 |
| NKEKIASLARQFLCRVWPSGDKEKSNISNDQLHALLCIYLEHTESILKAI    | 1200 |
| EETAGVGPPELINSKPDASSSTFPTLRHRTFVVFFRVMMAELEKTVKKIE    | 1250 |
| PGTAADSQQIHEEKLLYWNMAVRDFSILINLIKVFDSHPVLHVCLKYGRL    | 1300 |
| FVEAFKQCMPLLDFFSRKHREDVLSLETFQLDTRLLHHLHCGHSKIHQD     | 1350 |
| TRLTQHVPLLKKTELLVCRVKAMTLNNCREAFWGLNKNRDLQGEI K       | 1400 |
| SQNSQESTADESEDDMSSQASKSKATEDGEEDEVSAKEQDSDESYDDS      | 1450 |
| D                                                     | 1451 |

**B**

| Position | Sequence                            | Score |
|----------|-------------------------------------|-------|
| 2-27     | VSKRRLSKSEDKESLTEDASKTRKQP          | 10.1  |
| 24-55    | RKQPLSKKTKKSHIANEVEENDSIFVKLLKIS    | 7.2   |
| 2-30     | VSKRRLSKSEDKESLTEDASKTRKQPLSK       | 6.8   |
| 24-58    | RKQPLSKKTKKSHIANEVEENDSIFVKLLKISGII | 5.7   |
| 30-55    | KKTKKSHIANEVEENDSIFVKLLKIS          | 5.6   |

**Figures S1A and B**

Hs 1 -MVKRRRLSKSEDKES-LTEDA-SKTRKQPLSKKIKKSHIANEVEENDSIFVKLLKISGI  
Pt 1 -MVKRRRLSKSEDKES-LTEDA-SKTRKQPLSKKIKKSHIANEVEENDSIFVKLLKISGI  
Mm 1 -MISKRRRLDSEDKEN-LTEDA-SKT--MPLSKLAKKSHNSHEVEENGSVFVKLLKASGL  
Cf 1 -MVKRRRLSKSEDKES-LTEDA-SKARKQPLSKKIKKSHVREVEENDSVFVKLLKISGI  
Gg 1 -MVKRRRLSKIDAAEESKTDLOSRCPETKRSRISDKRAPSQGGLENEGVFEELLRTSGI  
Xt 1 -MVAKRRLSRSDREESFAADTS-KNKKCRITSSKKTALPQDGVVENDSIFVQLLKSSGM  
Dr 1 MMRKKRISVIVD--EDPTLDVS-KAKKSKSSGRSTKSSVQD--SCQDSVVFVQFLKESGV

Hs 58 ILKTGESONQLAVDQAFQKKLFQTLRHRPSYPKIIIEFVSGLESYIEDEDSFRNCLLSC  
Pt 58 ILKTGESONQLAVDQAFQKKLFQTLRHRPSYPKIIIEFVSGLESYIEDEDSFRNCLLSC  
Mm 56 TLKTGENONQLAVDQVIFQKLFQALRKHPPAYPKVIEEFVNGLESYTEDSESLRNCLLSC  
Cf 58 ILKTGESONQLAVDQVIFQKKLFQTLRKHPSYPKIIIEFVSGLESYIEDQDSFRNCLLSC  
Gg 60 ILKVGEGONEIADVQTAFAQKKLRVALEKHPSYPGVNEFISGLESYIKDRSQFKNCLLPC  
Xt 59 TLKSGDRONEIADVQAVFQKKLHQALRKHPRHPNVIQEFISGLESYIEDRDTFRNCLLPC  
Dr 56 TLTPGSIANEIADVQVIFQKILQORLRKSPREFPNIIQEFISALETYIEDPERFRNCLLPC

Hs 118 ERLQDEEA-SMGASYSKSLIKLLLGIDILQPAIIKTLFEKLPEYFFENKNSDEINIPRLI  
Pt 118 ERLQDEEA-SMGASYSKSLIKLLLGIDILQPAIIKTLFEKLPEYFFENKNSDEINIPRLI  
Mm 116 ERLQDEEA-SMGTFYSKSLIKLLLGIDILQPAIIKMLFEKVPQFLFESENRDGINMARLI  
Cf 118 ERLQDEEA-SMGTSYSKSLIKLLLGIDILQPAIIKTLFEKLPEYFFENVNSDGLNIPRLI  
Gg 120 TPARTEGSRITVHSYCESLIKLLLGIKILOPAVVTLLLEKPEFFFVVGTFGTNIPRLI  
Xt 119 GNROTEASTMVGSEHDSLMKLLGLEILOESVINTLFEKLPEFLYDSVSGDGISIPRLI  
Dr 116 VPAPTSQQDINSSSYQESLVRLLGLIEMLOTLVINTLFEKLPEFMFEGASEDGLNIPRLI

Hs 177 VSQKWLDRIVDGKDLTKIMQLISTAPENLQHDIIITSLPEILGDSQHADVKGELSDLLI  
Pt 177 VSQKWLDRIVDGKDLTKIMQLISTAPENLQHDIIITSLPEILGDSQHADVKGELSDLLI  
Mm 175 INQKWLDRIVDGKDLTAQMQLISVAPVNLQHDFITSLPEILGDSQHADVKGELGELLV  
Cf 177 ISQKWLDRIVDGKDLTKIMQLISTAPLYLQHDFITSLPEILGDSQHADVKGELSELLM  
Gg 180 VNQFKWLDGLIDSDLVKIMQMSVSPVPIQHDIIITSLPEILEDSQNEVAREISCLLK  
Xt 179 INQFKWLDRIIDCKDLTKIMQLISVAPVDIQHDIIITSLPEILEDSQHNDVARELNSLLQ  
Dr 176 VNQKWLDRIVDGKDLSSKIMQMSVAPVEIQRDIITSLPEILEDSQHGDMAKELNGLLQ

Hs 237 ENTSLTVPILDVLSLRLDPNFKLVRQVMDKLSIRLEDLPVVIKFIHLSVTAMDTLE  
Pt 237 ENTSLTVPILDVLSLRLDPNFKLVRQVMDKLSIRLEDLPVVIKFIHLSITAVDALE  
Mm 235 QNTSLTVPILDVLFSSLRLDPNFKLVRQVMDKLSVRLDEFPVFKFVILHLSVTDITTSLE  
Cf 237 ENTLLTVPILDVLSLRLDPKLLQVRQVMSKLLSVKLDLDPVVIKFIHLSVTATDALE  
Gg 240 QGRRLTVPILDALSRDLDAELLAKVROSAMTIVPSVKLEDLPVIKFIHNVKAADAVE  
Xt 239 QNTQLTVPILDALSSLNNTDLLSEVROSVMSTLSAVELEDLPVVIKFIHSAVTPSDAVE  
Dr 236 QNTQLAVPILDALSSNLSSSTLLSEVREAVMGTLSAVQLEDLPVVVKFVLSISASDANE

Hs 297 VISELREKLDLQHCVLP SRLQASQV K LKSKGRASS-SGNQESSGQSCIILLFDVIKSAIR  
Pt 297 VISELREKLDLQHCVLP SRLQASQV K LKSKGRASS-SGNQESSGQSCIILLFDVIKSAIR  
Mm 295 VIAELRENINVOQFLPSRLQASQSKLKSGLASS-SGNQENS DKDCIVLFDVIKSAIR  
Cf 297 VISELREKLDLQHCVLP SRLQASQSKLKNKGRASS-SGNQENS GQDCVILLFDVIKSAVR  
Gg 300 VISELRKSLDLS CVLPQLLGSQRKLSQAQASS-SMSQVTTSONCVKLLFDVIKLA VR  
Xt 299 VISELRKSLDLES CSSLAQHAKNKERNKPOAGSS--VNKTKSSDCVSLMMDVIKSAVR  
Dr 296 VVCDLRKLELEQCVLPVAVLQASQSRMKNKTVSRSSVSPSCSSGQDSVALILFDVIKSAIR

Hs 356 YEKTI SEAWIKAIENIASVSEHKVFDLVMLFIIYSTNTQ-TKKYIERVLRNKIRSGCIQE  
Pt 356 YEKTI SEAWIKAIENIASVSEHKVFDLVMLFIIYSTNTQ-TKKYIERVLRNKIRSGCIQE  
Mm 354 YEKTI SEAWIKAIERIESAAEHKALDVMLLI IYSTSTQ-TKKGVEKILRNKI QSDCIQE  
Cf 356 YEKTI SEAWIKAIESIASVSEHKTFDLAMLII IYSTNTQ-TKKYIERVLRNKIRSGCFQE  
Gg 359 FQKDVSEAWIKAIENISVSDHKVLDLIVLLLIHSTNSK-NRKQTEKVLRSKIRLGCMP E  
Xt 357 FQKHMSEAWIKAIENVDIVGDHKVSDLIVLLIYTTQTNSSKKQAERVLRNKIRSGFISD  
Dr 356 FQKTI SEAWIKAIENIDSESDHKVVDLIVLFIHSTNANHSRRGAERVLVKVKRKGLIQE

Hs 415 QLLQSTFVSHYLV LKDMCSSILSLAQSL LHS LDQSIISFGSLLYKYAFKFFD TYCQQEVV  
Pt 415 QLLQSTFVSHYLV LKDMCSSILSLAQSL LHS LDQSIISFGSLLYKYAFKFFD TYCQQEVV  
Mm 413 QLLDSAFVSHYLV LKDCPSIILLAQTLFHSQDQRIILFGSLLYKYAFKFFD TYCQQEVV  
Cf 415 ELLQSTFYIHYLV LKDCPSIILSLAQSL LHS LDQSIILFGSLLYKYAFKFFD TYCQQEVV  
Gg 418 QLLQNAFQNSVMDKDFPSILSLAQSLF LHS AHPAVV SFGSCMYKQAFVAFD SYCQQEVV  
Xt 417 QLLQNAFQNSVMDKDFPSILSLAQSLR SAEQSV SFGSLMYKSAFVAFD SYCQQEVV  
Dr 416 SLLQKTEFKGHAQVMRGYFPSIILALAQGLLRS PDCCVVPFGGHMYKQAFVAFD SYCQQEVV

Hs 475 GALVTHCSGNEAEVDTALDVLELVVLPNSAMMNAVFVKGILDYLDNISPOQIRKLFY  
Pt 475 GALVTHCSGNEAEVDTALDVLELVVLPNSAMMNAVFVKGILDYLDNISPOQIRKLFY  
Mm 473 GALVTHCSGTEAEVDTALDVLELVVLPNSAMRLNAFVKGILDYLENMSPOQIRKIFC  
Cf 475 GALVTHCSGSEAEVDTALDALLELVVLPNSAMRLNAVFVKGILDYLDNMSPOQIRKLFY  
Gg 478 CALVTHCSGNETEIDISLDVLTDLVILHPSLRLRYATFVKITILDSMOKLNPCQIRKLFY  
Xt 477 GALVTHCSGYPAEVDVSLDVLTDLVSSHAAAVAVAVFVKGILDYLDNLNAQQIRKLFH  
Dr 476 GSLVTHACSGVSEVDVALELILCELVSQKPAEMSQFTVFKGILDYMDNLTSSQIRRLFH

Hs 535 VLSTLAFSKQNEASSHIQDDMHLVIRKQLSSTVFYKYLIGIIGAVTMAGIMAADRSESPS  
Pt 535 VLSTLAFSKQNEASSHIQDDMHLVIRKQLSSTVFYKYLIGIIGAVTMAGIMAADRSESPS  
Mm 533 ILSTLAFSQQPGTNSHIQDDMHLVIRKQLSSTVFYKYLIGIIGAVTMAGIMAEDRSVPSN  
Cf 535 ILSLAFSKH-EASSHIQDDMHLVIRKQLSSTVFYKYLIGIIGAVTMAGIMAADRSS--N  
Gg 538 ILSTLAFSQRQ-EGSYIQDDMHVIRKWLSSVFNHKGIGIIGAVTMGSAVKRNEADG  
Xt 537 ILSVLAFSFGQ-EGSHIQDDMFLVIRKQLSSTALKYKRIGIIGAVRMVGSMAVNNNVTKH  
Dr 536 ILSRLAFGQEQ-HGGHIQDDMHLVIRKQLSSTVPKYKRIGIIGAVMMVGSMAVCRNKHD-

Hs 595 L--TQERANLSDDEQCTQVTSLLQLVHSCSEQSPQASALYDEFANLIQH--EKLDPKALE  
Pt 595 L--TQERANLSDDEQCTQVTSLLQLVHSCSEQSPQASALYDEFANLIQH--EKLDPKPWE  
Mm 593 S--SQRSAVNSSEQRTQVTSLLQLVHSCTEHSPWASSLYDEFANLIQE--RKLAPKTLE  
Cf 592 L--TQGRFDLSNEEYQVTSLLQLVHSCSEQSPQASALYDEFANLIQ--GKLAPKALE  
Gg 597 GLL--ERPPELSTIECDGQLSTLLDLVGFCEQIPEVLALYDELANLIEKQKGNLQLQLD  
Xt 596 GSKNPEVNNPLSAESFRQVTALELVQICSEQVPEASALYDELSSLVQK--RNLDPVMS  
Dr 594 ---GSQGTLPKQETNRQVMALLELVRSCESSPEAAALCYDELANLIQT--CKLDPVQA

Hs 651 WVGHTICNDFQDAFVVDSCVVPEGDFPFPVKALYGLEEYDTQDGIAINLLPLLFSQDFAK  
Pt 651 WVGHTICNDFQDAFVVDSCVVPEGDFPFPVKALYGLEEYDTQDGIAINLLPLLFSQDFAK  
Mm 649 WVGQTIENDFQDAFVVDSCAAPEGDFPFPVKALYGLEEYSTQDGIVINLLPLFY-QECAK  
Cf 648 WVGQTIENDFQDAFVVDSCVSPGDFPFPVKALYGLEEYSSHDGIVINLLPLMFSQDFAK  
Gg 655 KFGKSLVDFPNDFVVDLSPTVDSGLFVPKSLYNLDEDETOGAIAINLLPLVSOSEPGR  
Xt 654 WVGKTVITDFQDDFVVDLPTPTVEGNYIFPVKAMYNLDEDDSQGGIAINLLPVLSKDMCSR  
Dr 649 WVGKSLVDFQDDFVVDLGPDISGAFMFPVSVLYNLDEESEGGIAVNLPLMALDQQHK

Hs 711 DGGPVTSESGQKIVSPLCLAPYFRLLRLCVERQHNGNLEEIDGLLDCPIFLTDLPEGK  
Pt 711 DGGPVTSESGQKIVSPLCLAPYFRLLRLCVERQHNGNLEEIDGLLDCPIFLTDLPEGK  
Mm 708 DASRATSESSQRSMSLCLASHFRLLRLCVARQHDGNLDEIDGLLDCPLFLPDLEPGEK  
Cf 708 DGRMTSKESDQKIVSPLCLAPYFRLLRLCVERQHNGNLEEIDGLLDCPIFLTDLPEGER  
Gg 715 VAD--EMSNRKRIVSPLCLSPFRLLRLRYTGEQNNGSLEEIDALLGCPLYLTDLEVEGK  
Xt 714 -GAEQAANKESRIVSPLCLSPFRLLRLCIEDQHEGNLEEIDALLGCPLYLTDLEITEK  
Dr 709 TDTSQPAGVKRERIVSPLCLSPFRLLRLCEVQHEGDLEEIDALLGCPLILTDMEVVEK

Hs 771 LESMSAKERSFMCSLIFLTLNWFREIVNAFCQETSPEMKGKVLTRLKHIVELQIILEKYL  
Pt 771 LESMSAKERSFMCSLIFLTLNWFREIVNAFCQETSPEMKGKVLTRLKHIVELQIILEKYL  
Mm 768 LESMSAKERSLIMCSLIFLTLNWFREVVNAFCQETSPEMKGKVLRLKDIIVELQIGILEKYL  
Cf 768 LESMSVKEHSFMCSLIFLTLNWFREVVNAFCQETSPEMKGKVLTRLKHIVELQORILEKYL  
Gg 773 LLSLSKQEREFICSLIFLALNWFREVVNAFCQQDAEMKGKVLTRLQNTLQNVLGKCL  
Xt 773 MESLSKQEREFICSLIFLALNWFREIVNAFCQQDLDMKSKVLTRLQNTLQSVLEKCL  
Dr 769 VLSLSKSEREFICSLIFLHTLNWFREVVNAFCRQNDPEMCKVTRIQNITYLQSLLOTCL

Hs 831 AVTPDYVPPLCNFDVETLDITPHIVTAISAKIRKKGKIE-RKQKTDGSKTSSSDTLSEEK  
Pt 831 AVTPDYVPPLCNFDVETLDITPHIVTAISAKIRKKGKIE-RKQKTDGSKTSSSDTLSEEK  
Mm 828 AVTPDYVPPFASVLDLTLDMMPRSSAVAAKNRNKGGTGGKKQKADSNKASCSDTLLETED  
Cf 828 AVTPDYVPPLANFDLTLDMPTPTAAISAKIRKQKIG-KKRKADGSKTSSPDTLSEKED  
Gg 833 AATPGYVPPATFDSEAPGVP SINAGPVRKING-----KKRKSDDSKACSAERTQADE  
Xt 833 AASPGLYPPSAQFDSEPEVIPSIAIASAPAKKAKKQAGCKTQKSAASKNSSADSSQLEE  
Dr 829 AATPGYVPPQANFDGESADVMIPSSVVOQKKGKKESSGR-KRKASASKNSSGDKSQLEG

Hs 890 NSECDPIPSHRGQLNKEFT----GKEEKTSLLLHNSHAFFRELDIEVFSILHCGLVTKFI  
Pt 890 NSECDPIPSHRGQLNKEFT----GKEEKTSLLLHNSHAFFRELDIEVFSILHCGLVTKFI  
Mm 888 TSECDMAPSGRSHVDKES----GKEGKTFVSLONYRAFFRELDIEVFSILHSGLVTKFI  
Cf 887 SSECDPIPSNRSLQLEKEFK----GKEERTSVSLONYHAFFRELDIEVFSILHCGLVTKFI  
Gg 888 SSGNQPDIT---ELSELEKSAAEKETGNPLAQLOSYPYFRELDIEVFSVLHCGLLTKSI  
Xt 893 HQDTEKSELEKTOPKFKSTGREKEESSKPTINLNSYRAYFRELDIEVFTVLQCGLLTRSV  
Dr 888 AADAEESQP---DPPEKESSEKEKEKDKGKSGVSLSSYWPFFRELDVEALSVLQCGLLSRTL

Hs 946 LDTEMHTEATEVVQLGPPPELLFLLLEDLSQKLESMLTPPIARRVPFLKKNKGSRNIGFSHLQ  
Pt 946 LDTEMHTEATEVVQLGPPPELLFLLLEDLSQKLESMLTPPIARRVPFLKKNKGSRNIGFSHLQ  
Mm 944 LDTEMHTEATEVVQLGPAELLFLLLEDLSQKLENMLTAPFAKRICCFKKNKGRONIGFSHLH  
Cf 943 LDTEMHTEATEVVQLQPPPELLFLLLEDLSQKLENMLTPSVAKRIPFLKSKGNRNIGFSHLH  
Gg 945 LDTEMHTEATEVVQLGPAELCFLLDMDCKLEHVLTPGSTRVPFLKERGNKDVGFSHLC  
Xt 953 LDSEMHTKATEVVQLGPAELVFLLEDLFRKTEHMLTST-VKRVMFLLKVKGSRNIGFSQLR  
Dr 945 LDTEHHSKLRTEVVQLGPAELLFLLLEDVWRKLDLDFSLTSAPAKKAPFLKGMKMDKAVGFAHLQ

Hs 1006 QRSAQELVHCVFQLLTPMCNHLENIHNYFQCLAAENHGVDGPGVKKVQYEHIMSSCYQRL  
Pt 1006 QRSAQELVHCVFQLLTPMCNHLENIHNYFQCLAAENHGVDGPAVKVQYEHIMSSCYQRL  
Mm 1004 QRSVQELVHCVFQLLTPMCNHLENIHNYFQCLGAEHLSADDKARATAQEQHTMACCYQKL  
Cf 1003 QRSAQELVAHSIVQLLTPMCNHLENIHNYFQCLAAENQGVVDGPRTKVEEYHMMSSCYQRL  
Gg 1005 QRSPEKNAVAVCVKLLKPLCNHLENMHNYFQTVI-PNQGVDVDESGLNIQEYQLMSSCYHQL  
Xt 1012 QKTPQEVAAQAVLHLLNSLCNHLENMHNYFQTLMLNENHGVDAPSVVDIKEHQYMSICYQLL  
Dr 1005 QENNAKEIATCCSDLLPTLCTHLENCHNHFQTLTENQGVVDAPNVDVKENQLMCSAYQLL

Hs 1066 LQVHFLFAWSGFSQEPENQNLLYSALHVLSSRLKQGEHS-QPLEELLISQSVHYLQNFHQ  
Pt 1066 LQVHFLFAWSGFSQEPENQNLLYSALHVLSSRLKQGEHS-QPLEELLISQSFHYLQNFHQ  
Mm 1064 LQVHFLFAWKGFTHQSKHRLLSALEVLSNRLKQMEQD-QPLEELVSQSFSYLQNFHHS  
Cf 1063 LQVHFLFAWNGEFOLENYNLLYSALEVLTNRLKQGEPE-QSLDELISQSFNYLQNFHSH  
Gg 1064 LLAERLFAWSGFSQHENSNLLRSALQVLADRLKPGETEFLPLEELISESFQYLLNFQAS  
Xt 1072 LQVHFLFAWSGFSQHENRKLKLSALIALAGRLKETEAE-PALDELVRQSFNYLKNLHSS  
Dr 1065 LQVHFLFAWSGFSIPEHRGLLKSALGILAGRLKEDQAD-LTLDQLSRHAFEYLLQNFIRST

Hs 1125 IPSFQCALYLRLMLVILEKSTASA--QNKKEIASLARQFLCRVW--PSGDKEKSNISND  
Pt 1125 IPSFQCALYLRLMLVILEKSTAST--QNKKEIASLARQFLCRVW--PSGDKEKSNISND  
Mm 1123 VPSFQCALYLRLMLVILEKSAVNP--QNKKEIASLAKQLLCRAW--PHGEKEKNPTFND  
Cf 1122 IPSFQCALYLRLMLVILEKSTAPT--QNKKEIASLAKQFLCRVW--PSGEKEKSSIPTE  
Gg 1124 IPSFQCAFILTLQVLMATSEKPMT---GWKREKMASLAKQFLCQSWMKPGGDREKGSHFNS  
Xt 1131 VPTCSSALCLTQQLLVIAEKANVLH--YREQETASMAKQFLCQPIQPSGEREKGTRYHE  
Dr 1124 VPSLNTALCLTQQLLVLPQYGGSNHRTYRE-QITSLTKHFLCQEWVTASGEKERGNKYNE

Hs 1181 QLHALLCIYLEHTSILKAEIEIAGVGVPELINSPKDASSSTFPTLRHTFVVFVRVMM  
Pt 1181 QLHALLCIYLEHTDLSILKAEIEIAGVGVPELINSPKDASSSTFPTLRHTFVVFVRVMM  
Mm 1179 HLHDVLYTYLEHTDNVLKAEIEITGVGVPELVSA PKDAASSTFPTLRHTFVVFVRVMM  
Cf 1178 QLHALLSVYLEHTDNLKAEIEIAGVGVPELINSPKDASSSMFPTLRQSFVIFVRVMM  
Gg 1181 ALHLLLCVYLEHTDNILKAEIEISSVGVPELINSKDCSSSTYPTLSRQTFVVFVRVMM  
Xt 1189 NLQSLLCIYLENTDDVLKAEIEIAGVGVPELVNAAKDAGSSSYPTLRQTFVVFVRVMM  
Dr 1183 TLQLLSVIYLEHTDDVLKAEIEIAGVGVPELVNAAKDANSRSWPTLNQTFVVFVYKCMMS

Hs 1241 ELEKTVKKTIEPQTAADSQQHEEKLLYWNMAVRDFSILINLIKVFDSHPVLHVCLKYGR  
Pt 1241 ELEKTVKKTIEPQTAADSQQHEEKLLYWNMAVRDFSILINLIKVFDSHPVLHVCLKYGR  
Mm 1239 ELEKTVKGLQAGTAADSQQHEEKLLYWNMAVRDFSILINLMKVFDSYPVLHVCLKYGR  
Cf 1238 ELEKTVKGLQAGTAADSQQHEEKLLYWNMAVRDFSILINLIKVFDSRPVLHVCLKYGR  
Gg 1241 QLESVVKSTIPAGKPSDSGEVQLEKLLKWNIAVRNFHILINLMKVFDSRPVLSICLKYGR  
Xt 1249 KLEKCVKCIQPSGKKAETLQEQTEQLLRWNIAVRDFHILINLMKVFDSRPVLSICLKYGR  
Dr 1243 ELEKAVKTIQPSKQMDNQEIQSEKLLTRNIAVRDFHILINLMKVFDSRPVLTIVCLKYGR

Hs 1301 FVEAFLKQCMPLLDVDFRKHREDVLSLLETQFQDTRLLHHLGHSKIHQDTRLTQHVPL  
Pt 1301 FVEAFLKQCMPLLDVDFRKHREDVLSLLETQFQDTRLLHHLGHSKIHQDTRLTQHVPL  
Mm 1299 FVEAFLKQCMPLLDVDFRKHREDVLSLLETQFQDTRLLHHLGHSKIRQDTRLTQHVPL  
Cf 1298 FVEAFLKQCMPLLDVDFRKHREDVLSLLETQFQDTRLLHHLGHSKIHQDTRLTQHVPL  
Gg 1301 FVEAFLKQCMPLLDVDFRKHREDVLSLLETQFQDTRLLHHLGHSKIHQDTRLTQHVPL  
Xt 1309 FVEAFLKQCMPLLDVDFRKHREDVLSLLETQFQDTRLLHHLGHSKIHQDTRLTQHVPL  
Dr 1303 FVEAFLKQCMPLLDVDFRKHREDVLSLLETQFQDTRLLHHLGHSKIHQDTRLTQHVPL

Hs 1361 KKTLELLVCRVKAMLTNNCREAFWLGNLKNRDLQGEETKSONSQ--ESTADESEDDMS  
Pt 1361 KKTLELLVCRVKAMLTNNCREAFWLGNLKNRDLQGEETKSONSQ--ESTADESEDDMS  
Mm 1359 KKTLELLVCRVKAMLTNNCREAFWLGTLKNRDLQGEETKSONSQ--ESTADESEDDMS  
Cf 1358 KKTLELLVCRVKAMLTNNCREAFWLGTLKNRDLQGEETKSONSQ--ESTADESEDDMS  
Gg 1361 KKTLELLVCRVKAMLTNNCREAFWLGTLKNRDLQGEETKSONSQ--ESTADESEDDMS  
Xt 1369 KKTLELLVCRVKAMLTNNCREAFWLGTLKNRDLQGEETKSONSQ--ESTADESEDDMS  
Dr 1363 KKTLELLVCRVKAMLTNNCREAFWLGTLKNRDLQGEETKSONSQ--ESTADESEDDMS



```

Hs 1419 Q-ASKSKATEFDGEFDEVSAGEKQDSD--SYDDSD-----
Pt 1419 Q-ASKSKATEVSLQNPPESCIDGCILLIVLSWWSRTLPTYVYQCMLLCPFPFP
Mm 1419 H-VSRNFATEFDGEFDEAS-DEQKQDSDSDSS-----
Cf 1416 Q-VSRSKTTEDAENDEVSDEKQDSDSDSD-----
Gg 1421 D---SAAEEFDGTFSDS-GGAGR-----
Xt 1429 IEEEEEEENSGSKEL-EGDEHN----DEDS-----
Dr 1423 AEESSDERNDGQEEVE-SESD-----

```

**Figure S1C**

**D**

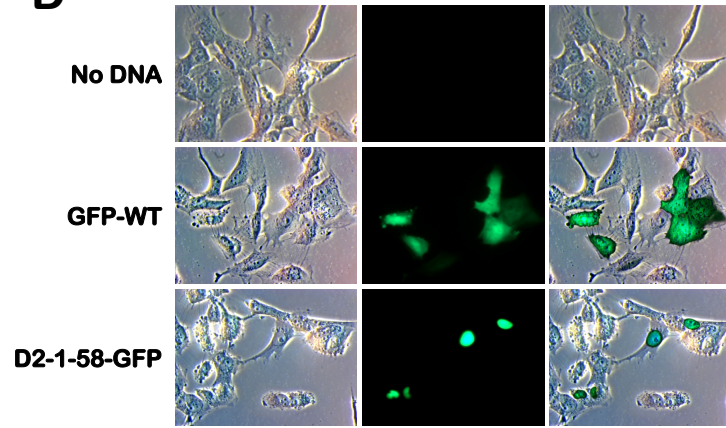

**Figure S1D**

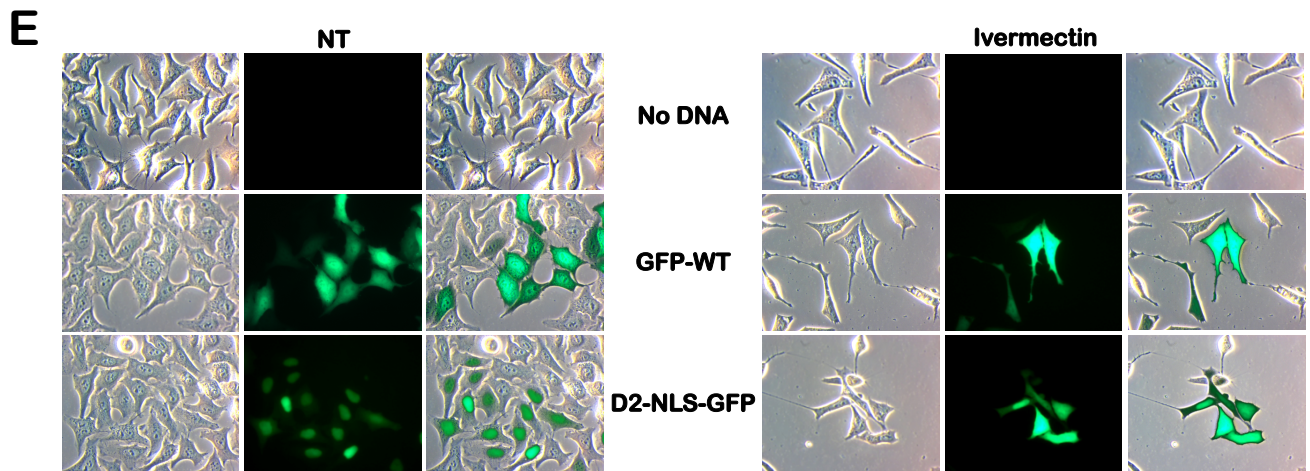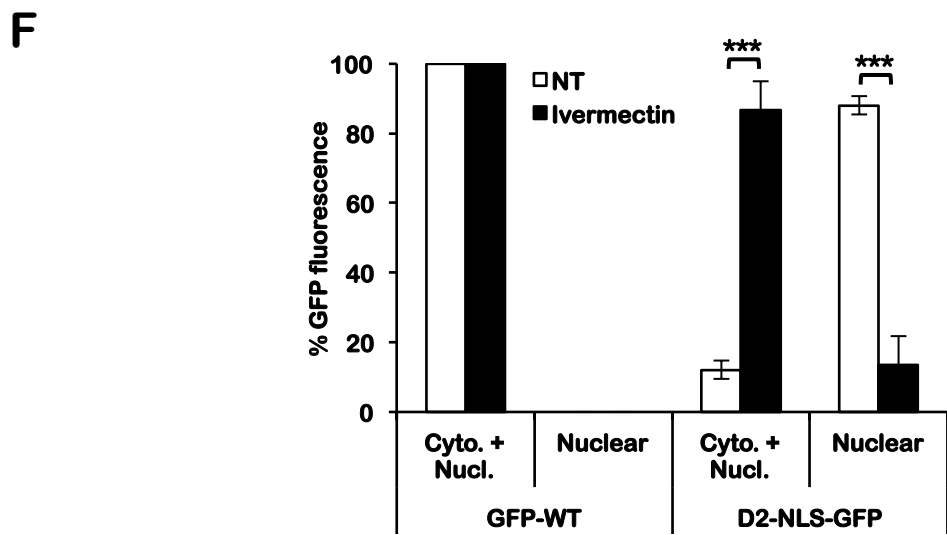

Figures S1E and F

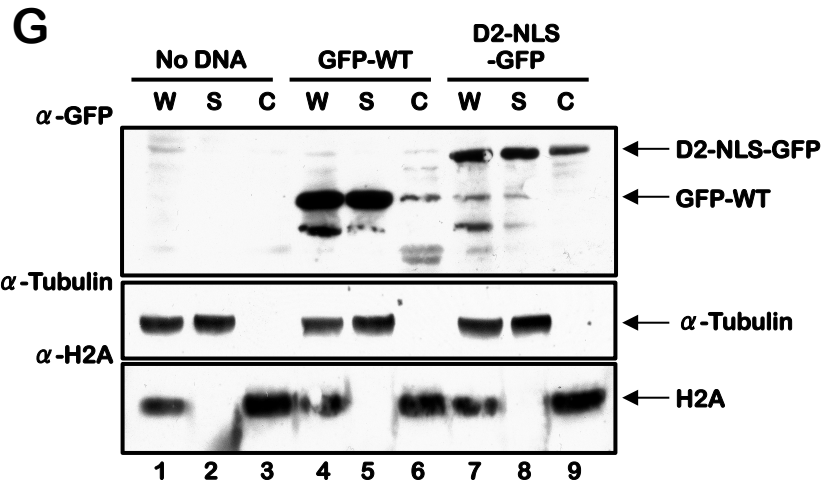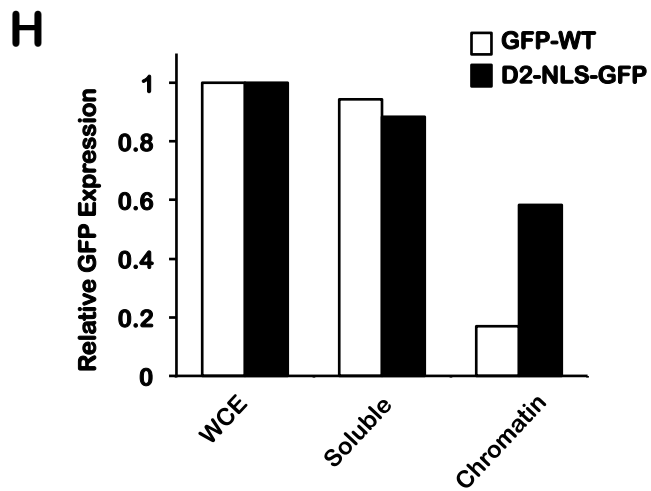

Figures S1G and H
