# Supplementary material for: Coordinate Nuclear Targeting of the FANCD2 and FANCI Proteins via a FANCD2 Nuclear Localization Signal
Source: PubMed Central journal article supplement (PMC3836817; doi:10.1371/journal.pone.0081387), 2013-11-21
Supplement: pone.0081387.s002.pdf [file pone.0081387.s002.pdf]

**A**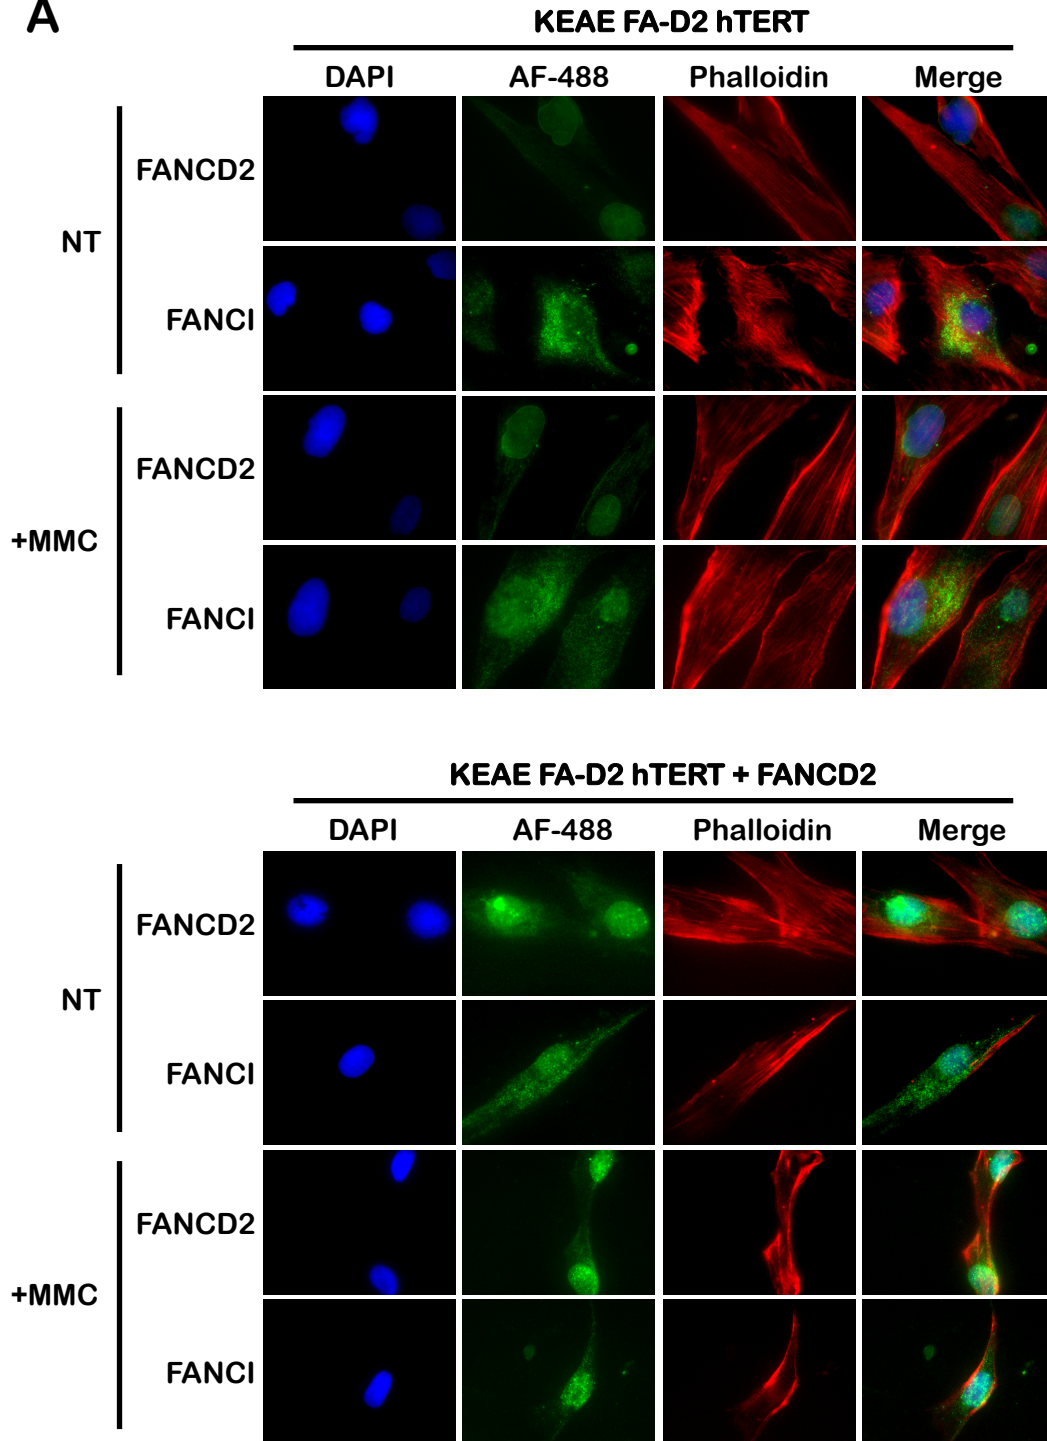**Figure S2A**

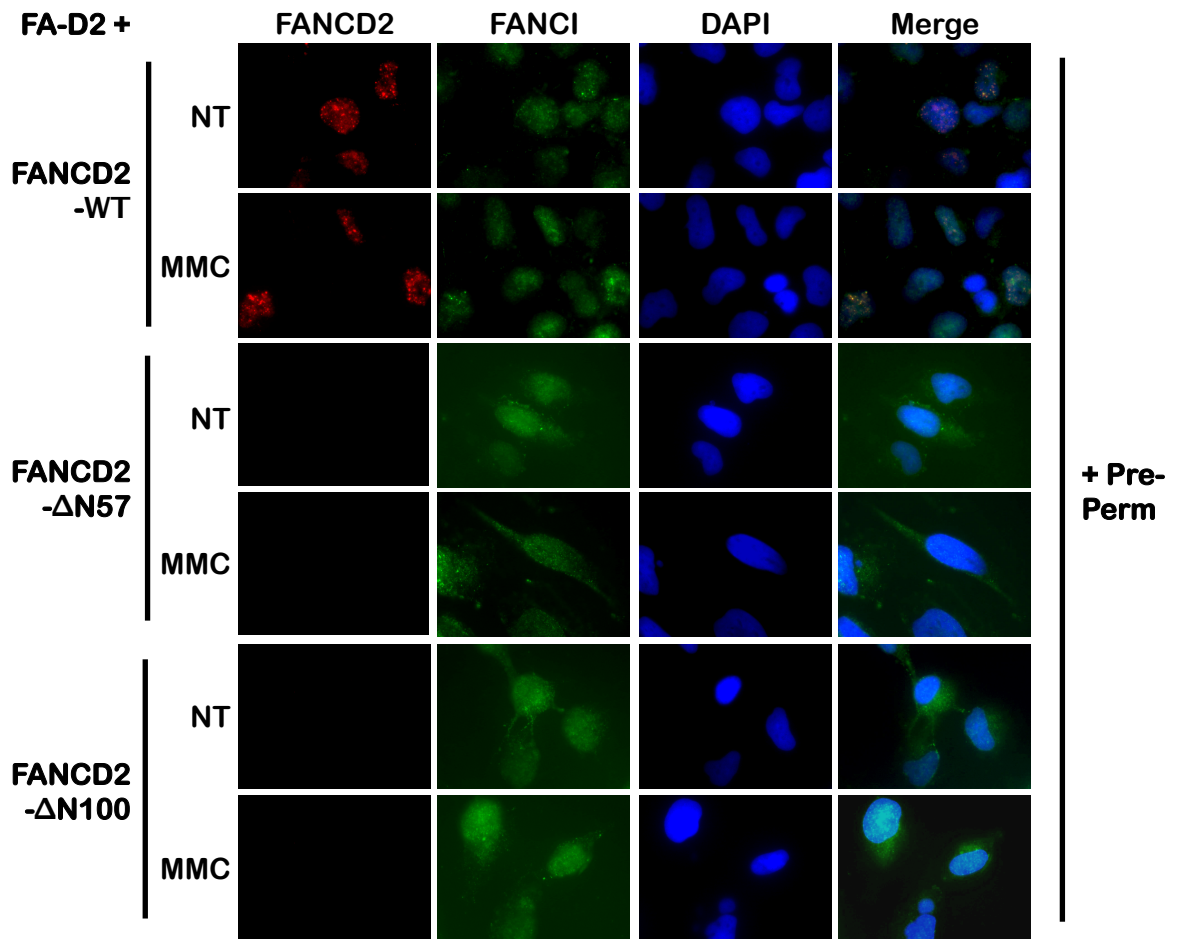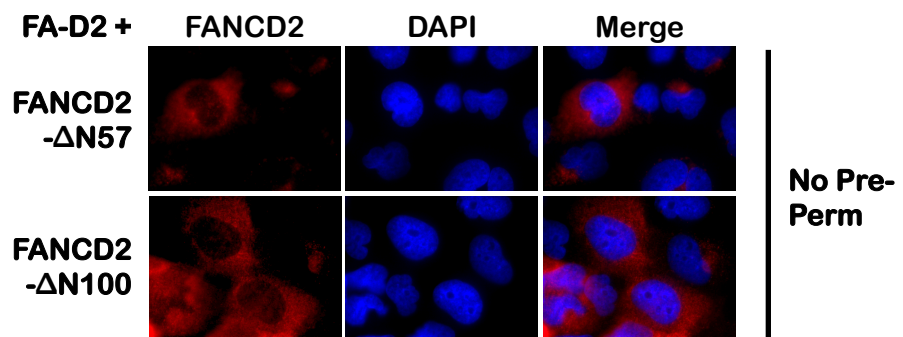

Figure S2B
